# Supplementary material for: Back to Nature: Combating Candida albicans Biofilm, Phospholipase and Hemolysin Using Plant Essential Oils
Source: MDPI journal article supplement (doi:10.3390/antibiotics10010081), 2021-01-15
Supplement: s1 [file s1]

# Back to Nature: Combating *Candida albicans* Biofilm, Phospholipase and Hemolysin Using Plant Essential Oils

Ahmed M. El-Baz <sup>1</sup>, Rasha A. Mosbah <sup>2</sup>, Reham M. Goda <sup>1</sup>, Basem Mansour <sup>3</sup>, Taranum Sultana <sup>4</sup>, Tanya E. S. Dahms <sup>4</sup> and Amira M. El-Ganiny <sup>5,\*</sup>

<sup>1</sup> Microbiology and Biotechnology Department, Faculty of Pharmacy, Delta University for Science and Technology, International coastal road, Gamasa City, Mansoura, 11152 Dakhaliya, Egypt; elbaz\_pharmacy@yahoo.com (A.M.E.-B.); Dr\_reham\_magdy@yahoo.com (R.M.G.)

<sup>2</sup> Infection control unit, Zagazig University hospitals, 44519 Zagazig, Egypt; rashamosbah@hotmail.com

<sup>3</sup> Pharmaceutical Chemistry Department, Faculty of Pharmacy, Delta University for Science and Technology, International Coastal Road, Gamasa City, Mansoura, 11152 Dakhaliya, Egypt; basem2412@yahoo.com

<sup>4</sup> Department of Chemistry and Biochemistry, University of Regina, Regina, SK S4S 1P4, Canada; taranum.sultana0@gmail.com (T.S.); tanya.dahms@uregina.ca (T.E.S.D.)

<sup>5</sup> Microbiology and Immunology Department, Faculty of Pharmacy, Zagazig University, 44519 Zagazig, Egypt

\* Correspondence: amiraganiny@yahoo.com or AMElganiny@pharmacy.zu.edu.eg; Tel.: 002-010-22799736, Fax: 002-055-2303266

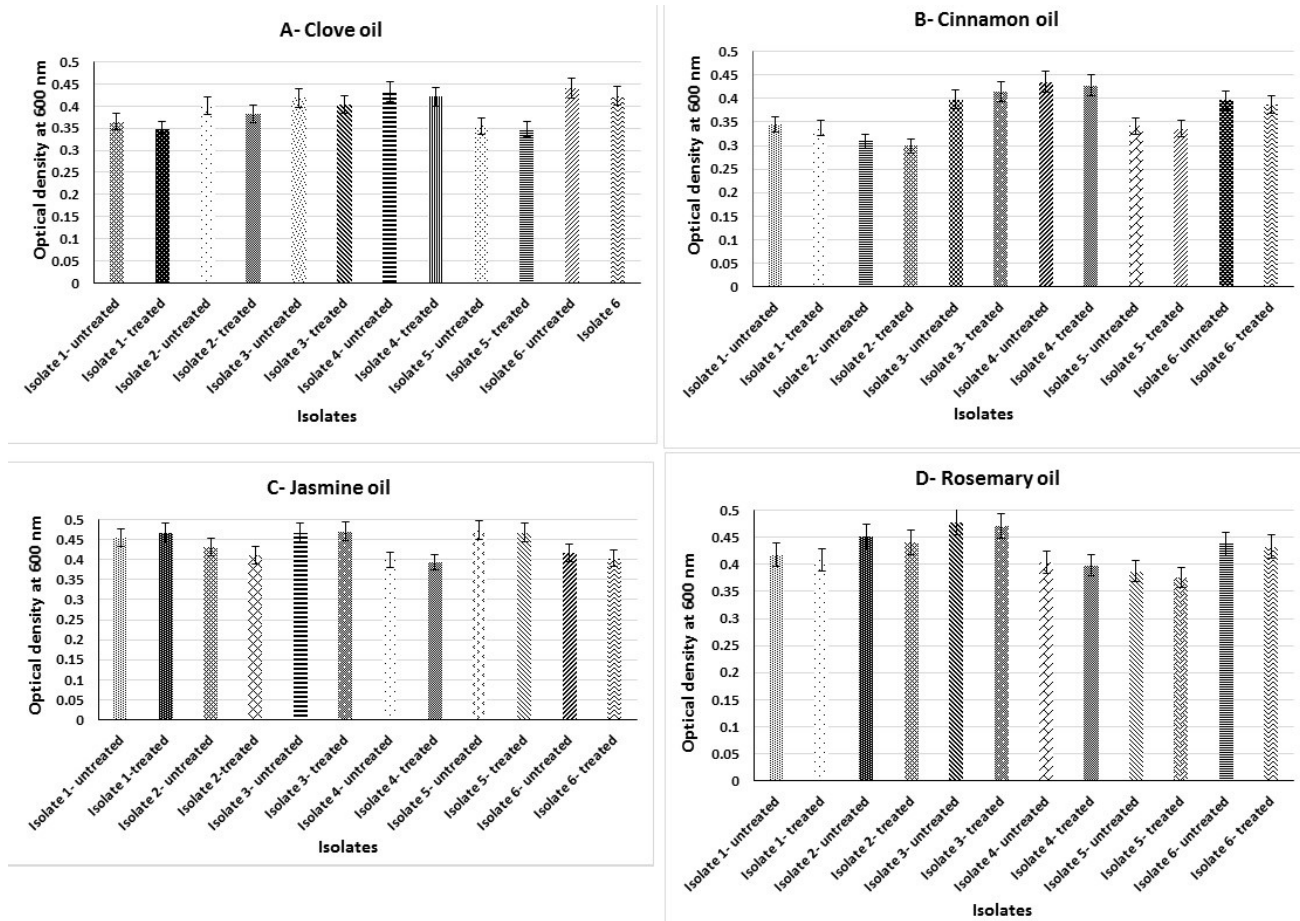

**Figure S1.** Effect of essential oils on *C. albicans* growth. The growth was assessed by measuring the OD600 of fungal suspensions after overnight incubation with  $\frac{1}{4}$  MIC of A- Clove oil, B- Cinnamon oil, C- Jasmine oil, D- Rosemary oil. Comparison was done for EO-treated cultures and untreated ones, the test was done in duplicate. EOS had no statistically

1  
2  
3  
4  
5  
6  
7  
8  
9  
10  
11  
12  
13  
14  
15  
16  
17  
18  
19  
20  
21

significant inhibition of fungal growth. The data shown are the means  $\pm$  standard errors. Unpaired t test (two-tailed) was used for statistical analysis.

22  
23

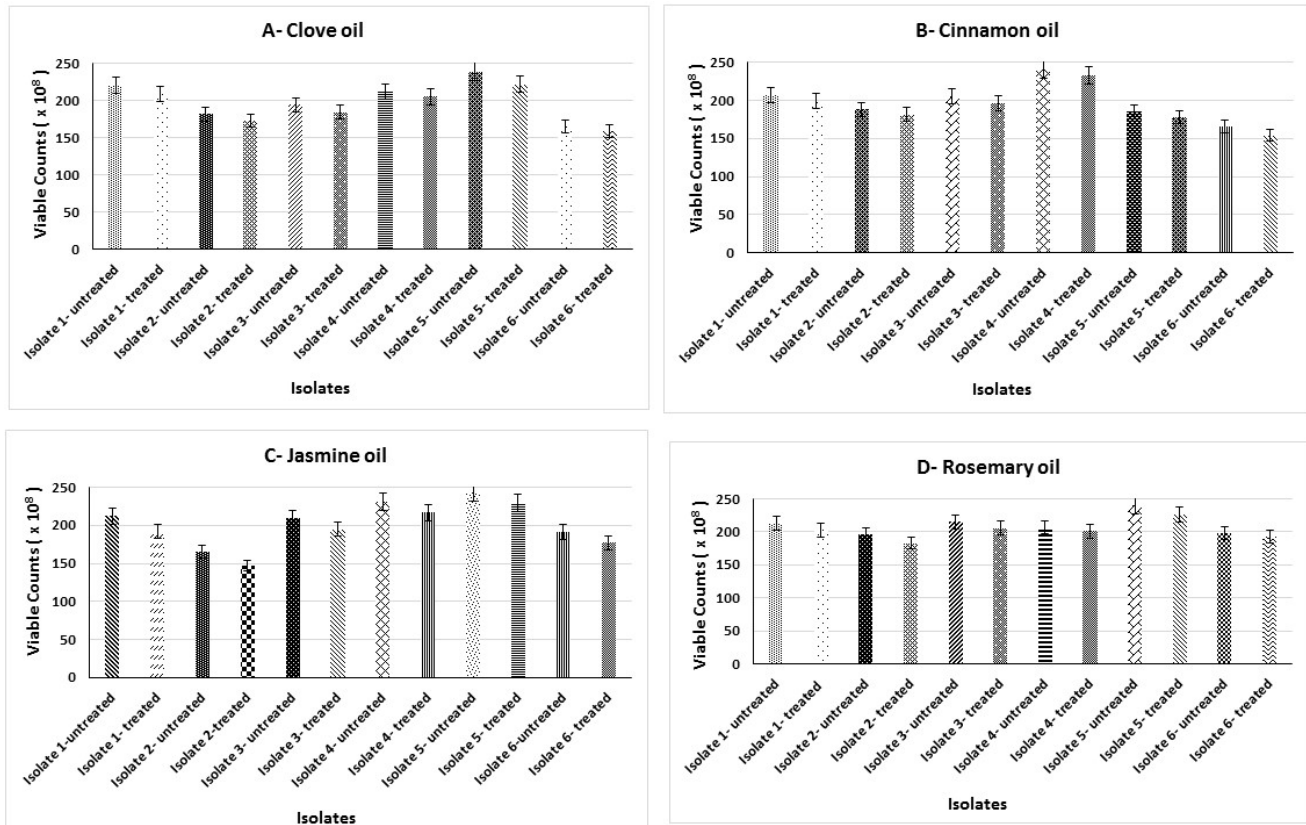

**Figure S2.** Effect of essential oils on *C. albicans* viability. The growth was assessed by measuring viable count after overnight incubation with  $\frac{1}{4}$  MIC of **A-** Clove oil, **B-** Cinnamon oil, **C-** Jasmine oil, **D-** Rosemary oil. Comparison was done for EO-treated cultures and untreated ones, the test was done in duplicate. EOS had no statistically significant effect on viability of *Candida* cells. The data shown are the means  $\pm$  standard errors. Unpaired t test (two-tailed) was used for statistical analysis.

24  
25  
26  
27  
28  
29
